# Supplementary material for: Wavelength- and irradiance-dependent changes in intracellular nitric oxide level
Source: PubMed Central journal article supplement (PMC7423318; doi:10.1117/1.jbo.25.8.085001), 2020-08-12
Supplement: JBO_025_085001_SD001.pdf [file JBO_025_085001_SD001.pdf]

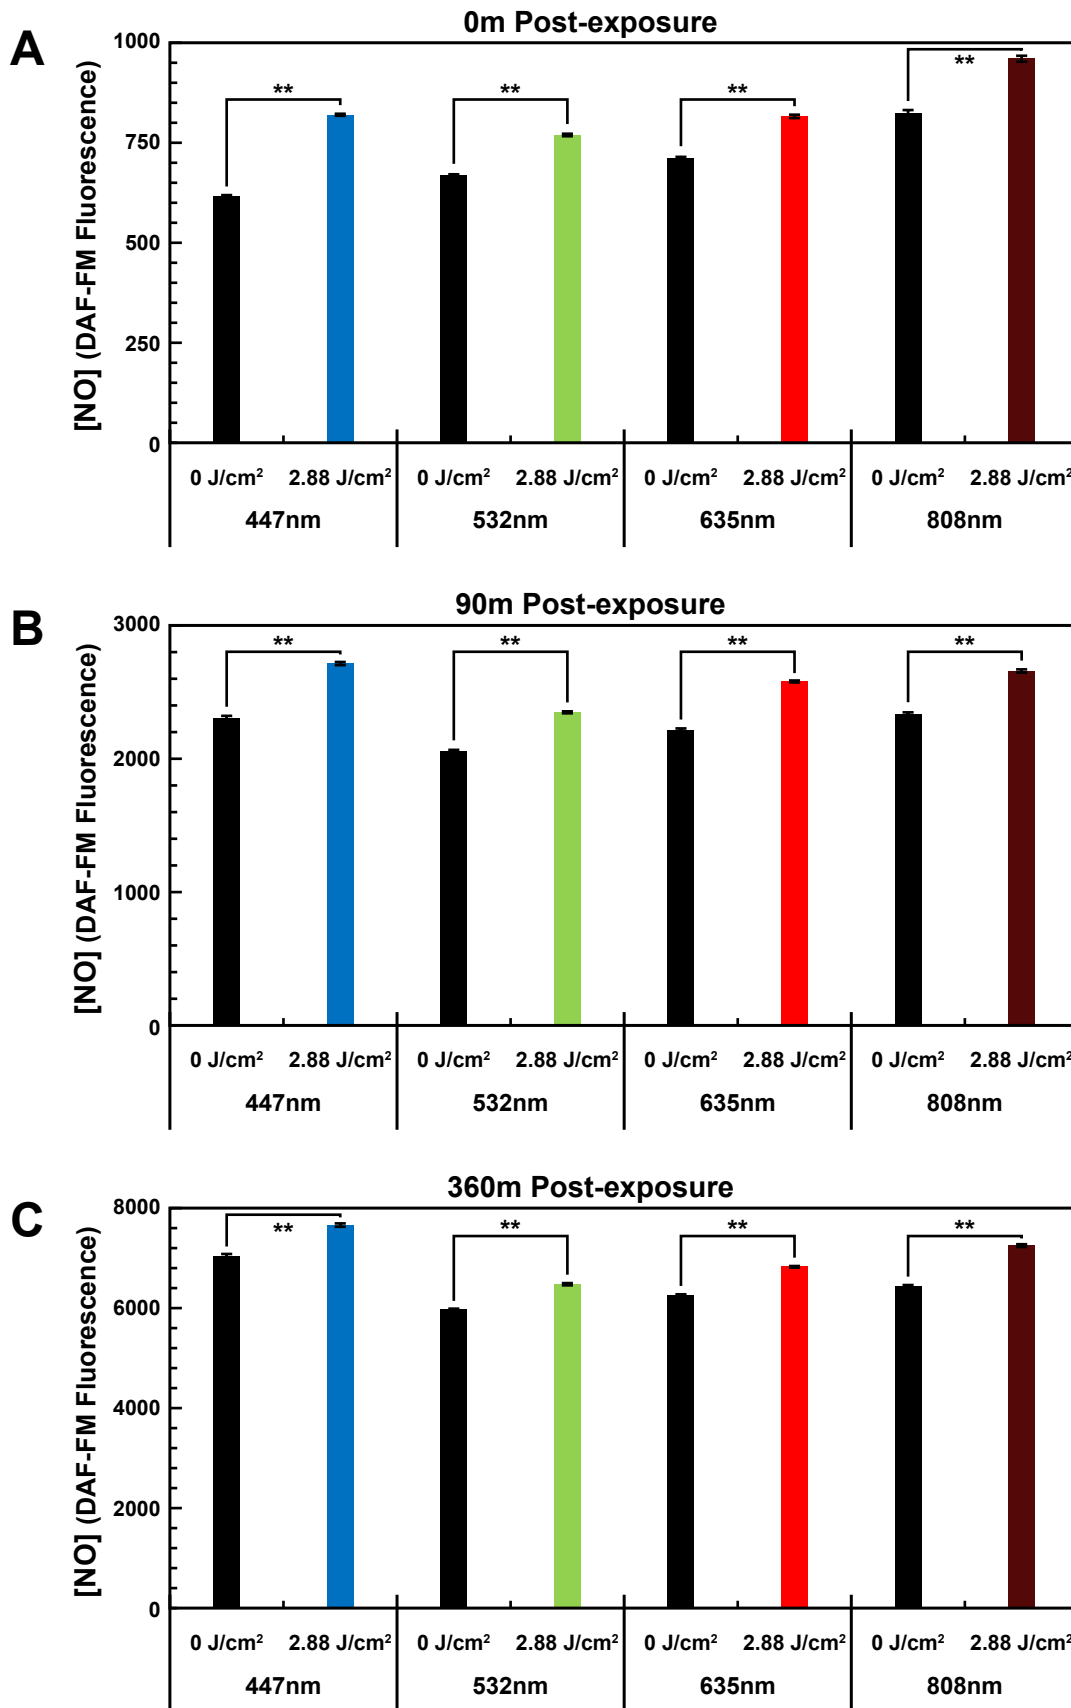

**Fig S1.** Raw DAF-FM fluorescence values following light exposure. (A) Graph of DAF-FM fluorescence  $\pm$  standard error immediately following exposure to  $2.88 \pm 0.06$  J/cm<sup>2</sup> of 447 nm (n=44), 532 nm (n=52), 635 nm (n=48), or 808 nm (n=56) light (all at an irradiance of  $800 \pm 17.9$   $\mu$ W/cm<sup>2</sup>) and corresponding unexposed controls. (B) DAF-FM fluorescence remains elevated at 90 min and (C) 360 min post-exposure. \*\* p<0.001.
